# Supplementary material for: A Macrophage Membrane–Polymer Hybrid Biomimetic Nanoplatform for Therapeutic Delivery of Somatostatin Peptide to Chronic Pancreatitis
Source: MDPI journal article supplement (doi:10.3390/pharmaceutics14112341), 2022-10-30
Supplement: s1 [file s1]

## Supplementary material

**Table S1.** Diameters of nanoparticles formed at different weight ratios of SST/PLGA.

| DMSO/Water<br>(V/V) | SST/PLGA<br>(W/W) | Aggregates | Diameter (nm) | PDI       |
|---------------------|-------------------|------------|---------------|-----------|
| 1:10                | 1:10              | +++        | 177.10±2.10   | 0.07±0.02 |
| 1:10                | 1:20              | +          | 150.32±1.01   | 0.11±0.01 |
| 1:10                | 1:50              | –          | 128.60±0.38   | 0.08±0.02 |
| 1:10                | 1:100             | –          | 117.96±1.49   | 0.15±0.03 |

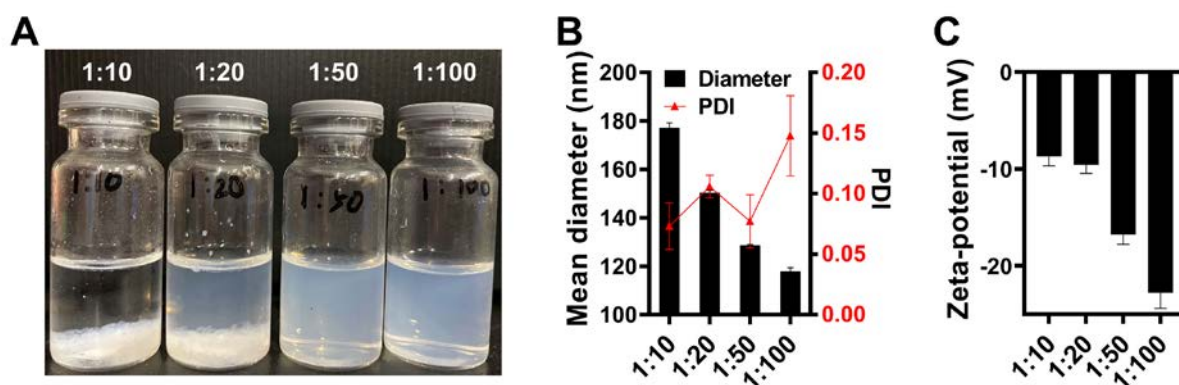

**Figure S1.** Fabrication of nanoparticles under different weight ratios of SST/PLGA. (A) The image of nanoparticle solutions fabricated under different weight ratios of SST/PLGA. Note the precipitation of nanoparticles at the bottom of vials under the conditions of 1:10 and 1:20 SST/PLGA weight ratios. (B) The diameters and (C) zeta-potentials of nanoparticles in the supernatant were increased by the increment of SST/PLGA weight ratios. (Mean ± SD, n=3).

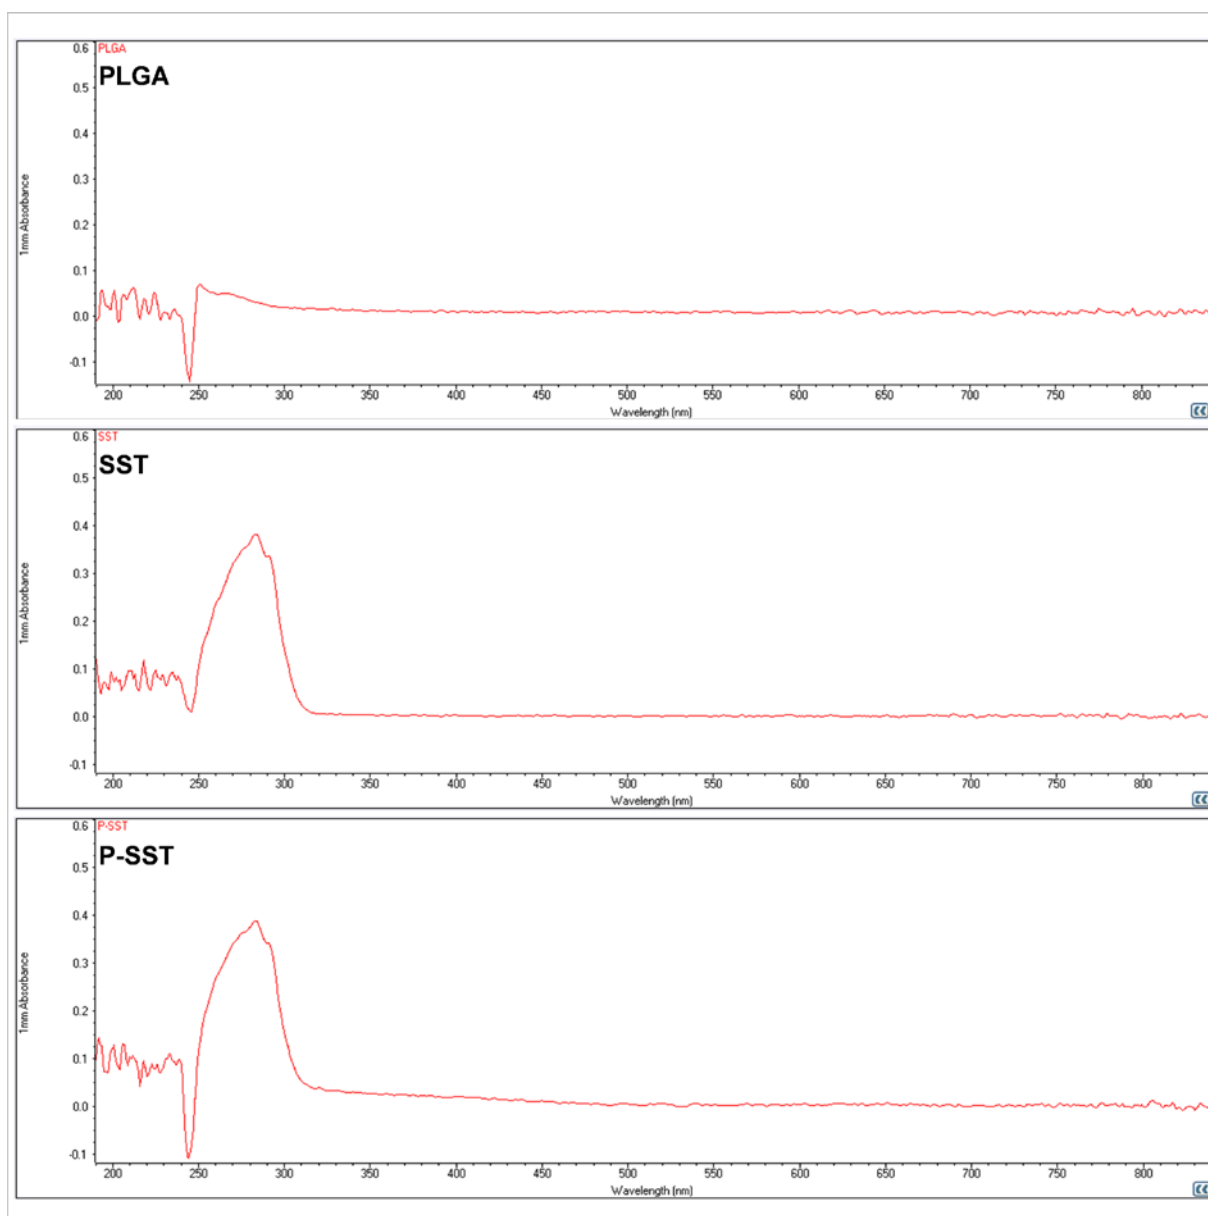

**Figure S2.** UV-VIS spectrum of PLGA nanoparticles, SST peptide and P-SST dissolved in DMSO. The spectrum of P-SST and SST showed a peak at 284 nm which was lack in the empty PLGA nanoparticles, demonstrating the successful encapsulation of SST in the P-SST nanoparticles.

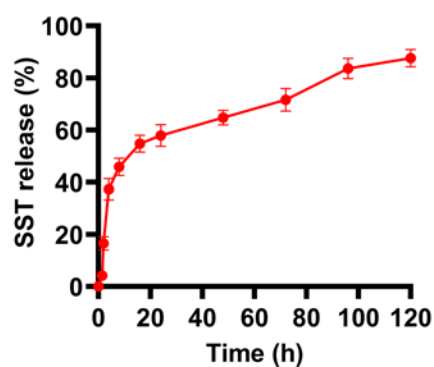

**Figure S3.** The release profile of SST from the MP-SST nanoparticles. (Mean  $\pm$  SD, n=3).
